# Supplementary material for: Patients’ healthcare, education, engagement, and empowerment rights’ framework: Patients’, caretakers’ and health care workers’ perspectives from Oromia, Ethiopia
Source: PubMed Central journal article supplement (PMC8360507; doi:10.1371/journal.pone.0255390), 2021-08-12
Supplement: pone.0255390.s003.pdf [file pone.0255390.s003.pdf]

## Families: List of Code Families and their Members

| Code Family                                                 | Codes                                                                                                                                                                                                                                                                                                                                                                                                                                                                                                                    |
|-------------------------------------------------------------|--------------------------------------------------------------------------------------------------------------------------------------------------------------------------------------------------------------------------------------------------------------------------------------------------------------------------------------------------------------------------------------------------------------------------------------------------------------------------------------------------------------------------|
| Patient right: Challenges                                   | <ul style="list-style-type: none"> <li>• patient right challenge: blaming patients for their illness</li> <li>• patient right challenge: fear of denial of services</li> <li>• patient right challenge: how do not teach patients</li> <li>• patient right challenge: insult from HWs</li> <li>• patient right challenge: lack of awareness from patients</li> <li>• patient right challenge: negligence from HWs</li> </ul>                                                                                             |
| Patient right:insuring strategies                           | <ul style="list-style-type: none"> <li>• patient right insurance: teach on service delivery methods</li> <li>• patient right insurance: teach patients about their rights</li> </ul>                                                                                                                                                                                                                                                                                                                                     |
| Patient_right: Access to drugs                              | <ul style="list-style-type: none"> <li>• Patient right: get drugs</li> <li>• patient right : get drug</li> <li>• patient right : get necessary drugs</li> <li>• patient right: get appropriate dose of drugs</li> <li>• patient right: get drug</li> <li>• Patient right: get medications</li> <li>• patient right: get right drug</li> <li>• Patient right: right to choice drug</li> <li>• patient right: right to get officious drugs</li> <li>• patient right: right to refuse any drug</li> </ul>                   |
| Patient_right: Access to personal medical records and cards | <ul style="list-style-type: none"> <li>• patient right: access to own medical card</li> </ul>                                                                                                                                                                                                                                                                                                                                                                                                                            |
| Patient_right: Admissions                                   | <ul style="list-style-type: none"> <li>• patient right : right to be admitted</li> <li>• Patient right: get bed for admission</li> </ul>                                                                                                                                                                                                                                                                                                                                                                                 |
| Patient_right: Diagnosis and investigations                 | <ul style="list-style-type: none"> <li>• Patient right: access to lab services</li> <li>• patient right : get lab result without delay</li> <li>• Patient right: well informed about service delivery process</li> <li>• patient right: can avoid uncomfortable procedure</li> <li>• Patient right: get lab result quickly</li> <li>• Patient right: get necessary examination</li> <li>• Patient right: say no to give sample if don't want to</li> <li>• Patient right: shouldn't be forced for examination</li> </ul> |
| Patient_right: diet and food advice                         | <ul style="list-style-type: none"> <li>• Patient right: get diet advice</li> <li>• patient right: get diet of their preference when admitted</li> <li>• patient right: get food quality-no expired food</li> <li>• patient right: get meal service when admitted</li> </ul>                                                                                                                                                                                                                                              |
| Patient_right: Don't know                                   | <ul style="list-style-type: none"> <li>• patient right: Don't know</li> <li>• Patient right: right to information-do's-don't</li> </ul>                                                                                                                                                                                                                                                                                                                                                                                  |

|                                                                   |                                                                                                                                                                                                                                                                                                                                     |
|-------------------------------------------------------------------|-------------------------------------------------------------------------------------------------------------------------------------------------------------------------------------------------------------------------------------------------------------------------------------------------------------------------------------|
|                                                                   | <ul style="list-style-type: none"> <li>• right vs responsibility-Don't know</li> </ul>                                                                                                                                                                                                                                              |
| Patient_right: Equal treatment without discriminations            | <ul style="list-style-type: none"> <li>• Patient challenge: discriminate by language</li> </ul>                                                                                                                                                                                                                                     |
| Patient_right: Facility use and instructions or directions to use | <ul style="list-style-type: none"> <li>• Patient right: get education how to use facilities in hospital</li> <li>• Patient right: right to use toilet</li> <li>• Patient right: well informed about service delivery process</li> <li>• Patient right: get help on directions</li> <li>• Patient right: get help/support</li> </ul> |
| patient_right: have caretaker                                     | <ul style="list-style-type: none"> <li>• Patient challenge: resting place for caretaker</li> <li>• Patient right: allow movement of caretaker</li> </ul>                                                                                                                                                                            |
| Patient_right: Infection_Preventions                              | <ul style="list-style-type: none"> <li>• Patient right: get mosquito net while admitted</li> <li>• Patient right: get protected from other infections</li> </ul>                                                                                                                                                                    |
| Patient_right: Know their illness                                 | <ul style="list-style-type: none"> <li>• Patient right: know my illness</li> <li>• Patient right: right to tell their illness</li> <li>• patient right : get information about their illness</li> <li>• Patient right: understand their illness in their own language</li> </ul>                                                    |
| Patient_right: Language use                                       | <ul style="list-style-type: none"> <li>• language barrier- in diagnosis</li> <li>• language barrier-no translation</li> <li>• Patient challenge: discriminate by language</li> <li>• Patient right: understand their illness in their own language</li> <li>• Patient right: use one's own language</li> </ul>                      |
| Patient_right: No right                                           | <ul style="list-style-type: none"> <li>• Patient right: I have no right</li> <li>• patient right: no right-dependent on health worker</li> <li>• Patient right: only beg-no right</li> </ul>                                                                                                                                        |
| Patient_right: Prompt care                                        | <ul style="list-style-type: none"> <li>• Patient right: promptly get care medication</li> <li>• Patient right: seen on time</li> <li>• patient right : get lab result without delay</li> <li>• patient right: get service promptly</li> <li>• Patient right: get treatment on time</li> </ul>                                       |
| Patient_right: referral and transfer                              | <ul style="list-style-type: none"> <li>• Patient right: right to be referred to higher care</li> <li>• Patient right: right to transferred to other hospital</li> </ul>                                                                                                                                                             |
| Patient_right: respect and dignity                                | <ul style="list-style-type: none"> <li>• Patient right: get respected</li> <li>• patient right: get dignity</li> <li>• patient right: moral respect</li> <li>• patient right: not respected at all</li> <li>• Patient right: no respect by guard</li> <li>• Patient right: Insult</li> </ul>                                        |
| Patient_right: Rest place/rooms                                   | <ul style="list-style-type: none"> <li>• Patient challenge: resting place for caretaker</li> </ul>                                                                                                                                                                                                                                  |

Patient\_right: Service and treatment

- Patient right: access to lab services
- Patient right: enough treatment
- Patient right: get services they want
- patient right : get free service as stated by law
- patient right : get service without financial barriers
- patient right : get treatment
- Patient right: well informed about service delivery process
- patient right: get adequate services
- patient right: get any service at any time
- patient right: get meal service when admitted
- Patient right: get necessary services while stay in hospital
- Patient right: get service in their own language/language they can understand
- patient right: get service promptly
- patient right: get service when admitted
- Patient right: get treatment on time
- patient right: get treated without discrimination
- Patient right: get update on treatment progress

Patient\_right: tell history and expression of ideas

- Patient right: right to tell their illness
- Patient right: express my feeling

Patient\_right: Informed decision and treatment choice

- Patient right: get services they want
- patient right: get diet of their preference when admitted
- Patient right: right to choice drug
- patient right: right to refuse any drug
- patient right: right to refuse medications
- patient right: right to refuse operations
- patient right: right to refuse x-rayed
- Patient right: right to select providers
- Patient right: right to select operation doctor
- Patient right: say no to give sample if don't want

Patient\_right: treatment progress monitor

- Challenge: Information on health progress
- Patient right: get update on treatment progress

Patient\_right: Counseling and information, empowering

- Patient right: get education how to use facilities in hospital
- patient right : get counseling
- patient right : get education on their health challenges
- patient right : get information about their illness
- Patient right: well informed about service delivery process
- Patient right: get advice on my health
- Patient right: get diet advice
- Patient right: right to information-do's-don't

Patient\_right: Follow up care

- Patient right: right get appointment-follow up care
